# Supplementary material for: CAR-mediated targeting of NK cells overcomes tumor immune escape caused by ICAM-1 downregulation
Source: PubMed Central journal article supplement — J Immunother Cancer. 2024 Feb 27;12(2):e008155. doi: 10.1136/jitc-2023-008155 (PMC10900364; doi:10.1136/jitc-2023-008155), 2024-02-27
Supplement: jitc-2023-008155supp001.pdf [file jitc-2023-008155supp001.pdf]

# CAR-mediated Targeting of NK Cells Overcomes Tumor Immune Escape Caused by ICAM-1 Downregulation

## Graphical Abstract

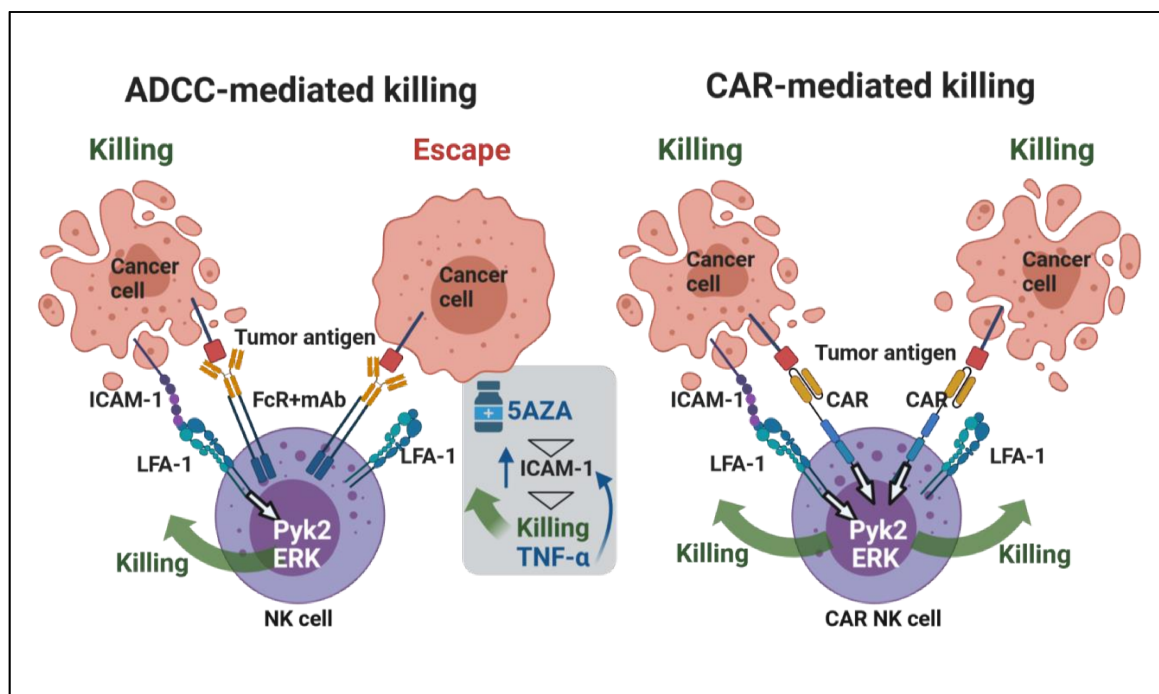

## Authors

Jiri Eitler, Wiebke Rackwitz, Natalie Wotschel, ..., Hans G. Klingemann, Winfried S. Wels, Torsten Tonn

## Correspondence

[j.eitler@blutspende.de](mailto:j.eitler@blutspende.de)

[t.tonn@blutspende.de](mailto:t.tonn@blutspende.de)

## Highlights

- ICAM-1 downregulation is a critical escape mechanism from trastuzumab-mediated NK cell cytotoxicity (ADCC).
- 5AZA treatment and TNF- $\alpha$  production restore trastuzumab-mediated NK cell cytotoxicity.
- CAR-NK cell cytotoxicity is independent of ICAM-1 levels by bypassing LFA-1 signaling through the Pyk2 and ERK1/2 pathway.
