# Supplementary material for: CAR-mediated targeting of NK cells overcomes tumor immune escape caused by ICAM-1 downregulation
Source: PubMed Central journal article supplement — J Immunother Cancer. 2024 Feb 27;12(2):e008155. doi: 10.1136/jitc-2023-008155 (PMC10900364; doi:10.1136/jitc-2023-008155), 2024-02-27
Supplement: jitc-2023-008155supp002.pdf [file jitc-2023-008155supp002.pdf]

1 **Supplementary Materials for**  
2 **CAR-mediated Targeting of NK Cells Overcomes Tumor Immune Escape**  
3 **Caused by ICAM-1 Downregulation**

4 Jiri Eitler, Wiebke Rackwitz, Natalie Wotschel, Venugopal Gudipati, Nivedha Murali Shankar,  
5 Anastasia Sidorenkova, Johannes B. Huppa, Paola Ortiz-Montero, Corinna Opitz, Stephan R.  
6 Künzel, Susanne Michen, Achim Temme, Liliana R. Loureiro, Anja Feldmann, Michael  
7 Bachmann, Laurent Boissel, Hans G. Klingemann, Winfried S. Wels, Torsten Tonn

8  
9 **Document includes:**

10 Supplementary methods

11 Supplementary figures

12 Supplementary references

13 **SUPPLEMENTARY METHODS**

14

15 **Cells and cell culture**

16 The established human NK cell line NK-92 was kindly provided by Hans G. Klingemann (Vancouver,  
17 Canada) (1). NK-92/5.28.z cells engineered with ErbB2-specific CAR were previously generated as  
18 described (2). NK-92-derived haNK cells, engineered to express FcγRIIIa and IL-2, were kindly provided  
19 by ImmunityBio, Inc. (Culver City, CA, USA) (3). NK cell lines were cultured in X-VIVO 10 medium  
20 (Lonza) containing 5% heat-inactivated human AB plasma (German Red Cross Blood Donation Service  
21 North-East, Dresden, Germany), 100 IU/mL penicillin, and 100 µg/mL streptomycin (Merck/Biochrom).  
22 NK-92 and NK-92/5.28.z cells were additionally supplemented with 500 IU/mL IL-2 (Proleukin; Novartis  
23 Pharma), referred to as complete X-VIVO 10 medium.

24 K562, MDA-MB-453, BxPc3, HEK293, and MCF-7 cells were purchased from the American Type  
25 Culture Collection (ATCC; Manassas, VA, USA). HT18584-HLA-E\*spG cells, with stable expression of  
26 disulfide-stabilized HLA-E trimer consisting of β2-microglobulin, VMAPRTLFL-peptide and HLA-  
27 E\*01:03 ectodomain, has been previously described (4).

28 K562 cells were cultured in RPMI 1640 (Merck/Biochrom) supplemented with 10% heat-inactivated fetal  
29 bovine serum (HI-FBS; Merck/Biochrom), 2 mM L-glutamine (Merck/Biochrom), 1 mM non-essential  
30 amino acids (Merck/Biochrom), 1 mM sodium pyruvate (Merck/Biochrom), 100 IU/mL penicillin, and  
31 100 µg/mL streptomycin. MDA-MB-453, BxPc3, HEK293, MCF-7 and HT18584-HLA-E\*spG cells were

32 cultured in DMEM medium (Merck/Biochrom) supplemented with 10% HI-FBS, 2 mM L-glutamine, 100  
33 IU/mL penicillin, and 100 µg/mL streptomycin. Medium for MCF-7 cells was additionally supplemented  
34 with 10 µg/mL insulin (Sigma-Aldrich).

35 Human primary NK cells were isolated from healthy donors in accordance with the guidelines approved  
36 by the local ethics committee. Peripheral blood mononuclear cells (PBMCs) were obtained by Biocoll  
37 density centrifugation (Biochrom), and NK cells were isolated from PBMCs by negative selection using  
38 the NK cell isolation kit according to the manufacturer's instructions (Miltenyi Biotec). Isolated NK cells  
39 were cultured in NK MACS medium (Miltenyi Biotec) supplemented with 5% human AB serum (German  
40 Red Cross Blood Donation Service North-East, Dresden, Germany), 1000 IU/mL IL-2 and 20 ng/mL IL-  
41 21 (Miltenyi Biotec).

42 All cells were cultured at 37°C in a humidified atmosphere with 5% CO<sub>2</sub> and routinely checked for  
43 *Mycoplasma* contamination.

44

#### 45 **Flow cytometry**

46 Cells were stained for 30 min on ice with antibodies specific for ErbB2 (191924; R&D Systems), CD16  
47 (3G8), LFA-1 (HI111), ICAM-1 (HA58), ICAM-2 (CBR-IC2/2), ICAM-3 (TU41) (all from BD  
48 Biosciences) and HLA-E (3D12HLA-E), Thermofisher Scientific and ErbB2 (REA1232) from Miltenyi  
49 Biotec. ErbB2-CAR detection was performed as previously described (5). Live cells were discriminated  
50 using 7-AAD (BD Biosciences). Samples were acquired using a BD FACSCanto II flow cytometer and  
51 data were analyzed using FlowJo software version 9 (BD Biosciences).

#### 52 **Lentiviral transduction**

53 ICAM-1 knock out cell lines were generated by lentiviral transduction with a Cas9-expressing vector  
54 (LentiCas9-Blast) followed by transduction with LentiGuide-Puro (both constructs were a gift from Feng  
55 Zhang; (6)) containing gRNA targeting ICAM-1 with the following sequence 5'-  
56 GCTATTCAAACCTGCCCTGAT-3'. Lentiviral particles were produced in HEK293T cells as packaging  
57 cell line with packaging vectors psPAX2 and pMD2.G. Plasmids were transfected with polyethyleneimine  
58 (PEI; Sigma-Aldrich), and supernatants were harvested after 48 hours. Viral particles were concentrated  
59 with PEG-it solution (System Biosciences) according to the manufacturer's instructions. Lentiviral  
60 transduction was performed at an MOI<1 by 30 min spinoculation at 1000 x g in the presence of 8 µg/mL  
61 Polybrene (Sigma-Aldrich). Human primary NK cells isolated as described above were activated with NK  
62 Cell Activation/Expansion Kit (Miltenyi) according to the manufacturer's protocol and transduced with  
63 ErbB2-CAR-encoding lentiviral vector (2) at an MOI=10 after 4 days by 60 min spinoculation at 1000 x g  
64 in the presence of 8 µg/mL Polybrene and 2.5 µM BX795 (InvivoGen). CAR expression was confirmed

65 by flow cytometry 72 hours after transduction, cells were expanded and used for experiments 7-14 days  
66 after transduction. CAR expression and NK cell purity were analyzed at the time of the experiment.

#### 67 **Europium-TDA (EuTDA) cytotoxicity assay**

68 Specific cytotoxicity of NK-92 cell lines against target cells was determined using an Europium (EuTDA)  
69 cytotoxicity assay (DELFI, PerkinElmer) according to the manufacturer's protocol. Briefly, target cells  
70 were loaded with an acetoxymethyl ester of the fluorescence-enhancing ligand (BATDA; Perkin Elmer)  
71 and then co-incubated in triplicates at 10,000 cells/well with effector cells with or without trastuzumab  
72 (Herceptin; 2 µg/mL; Roche) at the indicated E:T ratios. For blocking studies, NK cells were incubated  
73 with blocking antibodies prior to mixing with cancer cells as described below. After 2 hours of co-culture,  
74 supernatants were collected for measurement of the fluorescent signal reflecting target cell lysis using a  
75 VICTOR X4 fluorometer (PerkinElmer). Specific lysis was calculated according to the standard formula.

$$\% \text{ Specific release} = \frac{\text{Experimental release (counts)} - \text{Spontaneous release (counts)}}{\text{Maximum release (counts)} - \text{Spontaneous release (counts)}} \times 100$$

76

#### 77 **Treatment with 5-Aza-2'-deoxycytidine and TNF-α**

78 HEK293 cells were treated with 5-Aza-2'-deoxycytidine (5AZA; 1 µM; Selleckchem) for 72 hours or  
79 TNF-α (100 ng/mL; Thermofisher Scientific) for 48 hours, washed, analyzed by flow cytometry and used  
80 for cytotoxicity assays.

#### 81 **Live cell imaging cytotoxicity assays**

82 Live cell imaging cytotoxicity assays were performed using the IncuCyte S3 instrument (Sartorius)  
83 according to the manufacturer's protocol. Briefly, target cells were labeled with Cytolight Red reagent  
84 (Sartorius), and 1\*10<sup>4</sup> cells per well were plated in triplicates in a poly-L-ornithine (Sigma-Aldrich)-  
85 coated 96-well plate and incubated for 90 min at 37°C. Next, NK cells were added at a 1:1 E:T ratio.  
86 Where indicated, trastuzumab (Herceptin; 5 µg/mL; Roche) was added. For blocking experiments, NK  
87 cells were pre-incubated with anti-LFA-1 or anti-NKG2A antibody (20 µg/mL; TS1/22; Thermofisher) for  
88 60 min at 37°C. Cells were co-cultured in complete X-VIVO 10 medium in the presence of Cytotox Green  
89 (Sartorius) viability dye for 50 hours. Lysis was calculated as the percentage of dead target cells out of all  
90 target cells. Data were analyzed using IncuCyte software and normalized to the baseline. Alternatively,  
91 SKOV-3 cells were stably transduced with Nuclight Red fluorescent protein (Sartorius) and cytotoxicity  
92 was measured by plotting fluorescence area over time.

#### 93 **Blocking experiments**

94 For blocking experiments, NK cells were pre-incubated with antibodies at a concentration of 20 µg/mL for  
95 60 min at 37°C. The following antibodies were used: anti-LFA-1 (TS1/22; Thermofisher), anti-NKG2D

96 (1D11; BD Biosciences), anti-DNAM-1 (102511; R&D Systems), anti-NKp30 (P30-15; Biolegend), anti-  
97 NKp44 (44.189; Thermofisher), anti-NKp46 (9E2; Thermofisher), anti-2B4 (PP35; Thermofisher), anti-  
98 NKG2A (Z199; Beckman Coulter), IgG1 (107.3; BD Biosciences) and IgG2b (MPC-11; Biolegend).

#### 99 **Cytokine measurements**

100 NK and cancer cells were co-cultured in duplicates in complete X-VIVO-10 medium at an E:T ratio of 1:1  
101 at a density of  $5 \times 10^5$  cells/mL for each cell type. Where indicated, NK cells were blocked with anti-LFA-1  
102 antibody (20  $\mu$ g/mL; TS1/22; Thermofisher). After 6 hours, the cells were spun down and the supernatant  
103 was used for cytokine measurements using the Luminex assay (Procartaplex, Thermofisher) according to  
104 the manufacturer's protocols. Measurements were performed on the Luminex Flexmap 3D system.

#### 105 **Degranulation assay**

106 Flat-bottom 96-well plates were coated with antibodies or recombinant proteins at a concentration of 10  
107  $\mu$ g/mL for 60 min at 37°C. The wells were then washed 2x with PBS and finally aspirated. NK cells  
108 prepared in complete X-VIVO-10 medium without IL-2, and  $1 \times 10^5$  cells were added to each well in  
109 duplicates. Cells were incubated in the coated plates for 2 hours at 37°C in the presence of CD107a  
110 antibody (eBioH4A3; Invitrogen). Degranulation was stopped by transferring the plate to ice. The cells  
111 were harvested and analyzed by flow cytometry. The following antibodies and recombinant proteins were  
112 used for plate coating: anti-LFA-1 (TS1/22; Thermofisher), anti-NKG2A (Z199; Beckman Coulter), anti-  
113 PD-1 (MIH4; BD Biosciences), anti-TIGIT (MBSA43; Thermofisher), anti-Tim3 (F38-2E2; Biolegend),  
114 trastuzumab, human recombinant ErbB2-Fc (R&D Systems). Controls were coated with IgG1 (107.3; BD  
115 Biosciences), IgG2b (MPC-11; Biolegend) or human HSA (Baxter).

#### 116 **Western blot**

117 NK cells were rested in X-VIVO 10 medium without supplements for 60 min at 37°C and then transferred  
118 on ice to 96-well plates coated with antibodies or recombinant proteins. Coated plates were prepared as for  
119 the degranulation assay. After 20 min of activation at 37°C, cells were lysed by adding RIPA lysis buffer  
120 (Cell Signaling) containing protease and phosphatase inhibitor cocktails (Roche). Samples were mixed  
121 thoroughly, and incubated for 20 min on ice. Lysates were centrifuged and the supernatants mixed with  
122 Laemmli sample buffer containing DTT (Thermofisher). Proteins were fractionated by polyacrylamide gel  
123 electrophoresis (PAGE) on 4-12% Bis-Tris polyacrylamide gels and transferred to PVDF membranes  
124 (Novex). Nonspecific binding was blocked by incubation of membranes in TBST 5% BSA solution for 1  
125 hour, followed by incubation with primary antibodies overnight at 4°C. Rabbit anti-ERK1/2, anti-  
126 phospho-ERK(Thr202/Tyr204), anti-Pyk2, anti-phospho-Pyk2(Tyr402), and anti-Cyclophilin B antibodies  
127 were purchased from Cell Signaling. HRP-conjugated anti-rabbit secondary antibody (Cell Signaling) was

128 applied to the membranes for 1 hour at room temperature. Immunoreactive products were visualized using  
129 the Celvin S 420 imaging system (Biostep).

### 130 **Conjugation assay**

131 NK and cancer cells were differentially labeled with PKH-67 or PKH-26 membrane dyes (Sigma-Aldrich)  
132 according to the manufacturer's protocol. Cells were washed 4x with serum-containing medium and  
133 further kept in complete X-VIVO-10 medium at 37°C for 1 hour to wash out residual PKH and prevent  
134 cross-staining. Samples were then resuspended in fresh complete X-VIVO-10 medium.  $1 \times 10^5$  NK cells  
135 were mixed with  $2 \times 10^5$  cancer cells in a final volume of 200  $\mu$ L, centrifuged (50 x g, 1 min) and incubated  
136 for 20 min at 37°C. Cell-cell interactions were stopped by brief vortexing and addition of 300  $\mu$ L of 0.5%  
137 paraformaldehyde (PFA, Sigma-Aldrich). Samples were then acquired directly on a BD FACSCanto II  
138 flow cytometer, and conjugates were determined as double-positive events.

### 139 **Confocal microscopy**

140 Conjugates between NK cells and target cells at a 1:1 ratio were formed in suspension for 5 min and  
141 adhered to poly-L-lysine coated slides (Polyprep, Sigma-Aldrich) for 15 min, all at 37°C. LFA-1 was  
142 blocked with anti-LFA-1 (TS1/22; Thermofisher) at a concentration of 20  $\mu$ g/mL for 1 hour at 37°C prior  
143 to co-culture with target cells. Where indicated, trastuzumab (2  $\mu$ g/mL) was added. Cells were fixed and  
144 permeabilized with 4% formaldehyde for 15 min at RT, permeabilized with 0.1% Triton X-100 in PBS for  
145 15 min, and incubated 2x 5min in PBS containing 0.1% saponin. Slides were blocked with 1% BSA in  
146 PBS containing 0.1% saponin for 30 min and labeled with antibodies specific for perforin A647 ( $\delta$ G9; BD  
147 Pharmingen) and  $\beta$ -tubulin (rabbit; Cell Signaling) for 1 hour at RT. Slides were rinsed and stained with  
148 secondary anti-rabbit A555 antibody (Thermofisher) and phalloidin A488 (Life Technologies) for 1 hour  
149 at RT. Slides were rinsed and covered with 0.15 mm glass coverslips (Ibidi) using Prolong Gold Antifade  
150 reagent (Invitrogen) containing DAPI. Cell conjugates were visualized using a laser scanning confocal  
151 microscope (LSM 880; Zeiss) by scanning through the x-y plane. Detection settings were adjusted so that  
152 a control-stained sample was uniformly negative and experimental-stained samples did not saturate or  
153 bleed into other channels. Images were analyzed using Fiji/ImageJ software version 1.52p (National  
154 Institutes of Health) and Imaris (BitPlane). Effector and target cells in the conjugate were confirmed by  
155 the presence of perforin expression. The MTOC was defined as a point with the highest density of  $\beta$ -  
156 tubulin signal, and the immunological synapse was defined as a central point of contact of NK and target  
157 cell (visualized by differential interference contrast). MTOC polarization was calculated as the shortest  
158 distance from the MTOC to the immunological synapse.

**159 TIRF microscopy of the immunological synapse**

160 Lyophilized ErbB2-Fc protein (R&D Systems) was reconstituted with PBS following the manufacturer's  
161 instructions. Purification of ICAM-1 protein, fluorophore conjugation of proteins, preparation of  
162 generated supported lipid layers (SLB), microscopy setup for total internal fluorescence imaging mode,  
163 measurement of antigen densities and quantitation of receptor-engaged antigens were performed as  
164 previously described (7). Briefly, SLBs were loaded with ErbB2-AF555 and ICAM-1-AF488 proteins,  
165 and imaging experiments were performed at antigen densities of 281.84 and 303.40 molecules/ $\mu\text{m}^2$ ,  
166 respectively. In experiments imaging haNK cells in presence of trastuzumab, the imaging buffer (Hank's  
167 Balanced Salt Solution containing 2 mM  $\text{CaCl}_2$ , 2 mM  $\text{MgCl}_2$ , 2% FBS, 10 mM HEPES) was  
168 supplemented with 0.16  $\mu\text{g/mL}$  trastuzumab. Image processing was performed with the Fiji image  
169 processing package (v. Madison / 7 March 2011) based on ImageJ (v. 1.5) 48,49.

**170 Statistical analysis**

171 Statistical analyses were performed with GraphPad Prism 7 (Graphpad Software). Unpaired two-tailed  
172 Student's t-test was used for statistical calculations unless otherwise noted. A P value  $<0.05$  was  
173 considered statistically significant. \*\*\*\* $P<0.0001$ ; \*\*\* $P<0.001$ ; \*\* $P<0.01$ ; \* $P<0.05$ ; ns (not significant)  
174  $P\geq 0.05$ .

**175 SUPPLEMENTARY FIGURE LEGENDS**

176

**177 Figure S1: Generation of primary CAR-NK cells.**

178 (A) Human primary NK cells were isolated from PBMCs of healthy donors. Isolated NK cells were  
179 analyzed for purity by flow cytometry with CD3- and CD56-specific antibodies. Representative data are  
180 shown. (B) Primary NK cells were transduced with a lentiviral ErbB2.CAR construct. CAR expression  
181 was detected with an anti-Fab antibody 7 days after transduction. Representative data are shown.

**182 Figure S2: Effects of LFA-1 and immune checkpoint molecules on degranulation of haNK and NK-  
183 92/5.28.z cells.**

184 (A) NK-92/5.28.z cells were incubated for 2 hours with plate-bound ErbB2 protein in the presence of  
185 labeled anti-CD107a antibody followed by flow-cytometric analysis of CD107a. Data were pooled from 3  
186 independent experiments. Mean values  $\pm$  SEM are shown. (B) haNK cells were incubated with plate-  
187 bound trastuzumab and anti-LFA-1, and NK-92/5.28.z cells with ErbB2 protein, in each case combined  
188 with plate-bound antibodies targeting the indicated inhibitory receptors or immune checkpoint molecules,

189 or respective isotype controls. Degranulation was measured by flow cytometric analysis of CD107a  
190 expression. Red lines indicate uninhibited degranulation of controls, while blue lines represent  
191 degranulation upon ligation of inhibitory receptors or immune checkpoint molecules. Representative data  
192 of 3 independent experiments are shown.

193 **Figure S3: Treatment of ICAM-1 high and ICAM-1 KO cancer cells with 5AZA or TNF- $\alpha$  and its**  
194 **effect on ADCC or CAR-mediated NK cell cytotoxicity.**

195 MDA-MB-453 cells (A, B) and MDA-MB-453 ICAM-1 KO cells (C, D) were treated with 1  $\mu$ M 5-aza-2'-  
196 deoxycytidine (5AZA) for 72 hours or with 100 ng/mL TNF- $\alpha$  for 48 hours as indicated. (A, C) The  
197 expression of ICAM-1 and ErbB2 was analyzed by flow cytometry. Representative histograms are shown.  
198 (B, D) haNK cells combined with trastuzumab, haNK, or CAR-engineered NK-92/5.28.z cells were  
199 incubated for 2 hours with MDA-MB-453 (B) or MDA-MB-453 ICAM-1 KO cells (D) pre-treated with  
200 5AZA or TNF- $\alpha$ . Specific cytotoxicity was measured using a Europium-based cytotoxicity assay. Data  
201 were pooled from 3 independent experiments. Mean values  $\pm$  SD are shown.

202 **Figure S4: Effect of NKG2A blockade on ADCC or CAR-mediated NK cell cytotoxicity in SKOV-3**  
203 **cells.**

204 (A) Phenotypic profiling of SKOV-3 cells by flow cytometry. Representative histograms are shown. (B)  
205 NK-92/5.28.z cells and haNK cells with trastuzumab were incubated with anti-NKG2A blocking antibody  
206 or control IgG for 60 min followed by co-culture with SKOV-3 cells for 2 hours, and specific cytotoxicity  
207 was measured using a Europium-based cytotoxicity assay. (C) Alternatively, NK cells were co-cultured  
208 with SKOV-3 NuLight Red (NR) cells and cytotoxicity was measured using the IncuCyte live cell imaging  
209 system for 72 hours. Data were pooled from 3 independent experiments. Mean values  $\pm$  SD are shown.

210 **Figure S5: Effect of NKG2A blockade on ADCC or CAR-mediated NK cell cytotoxicity in**  
211 **HT18584-HLA-E\*spG cells**



212 (A) Phenotypic profiling of HT18584-HLA-E\**sp*G cells by flow cytometry. Representative histograms  
213 are shown. (B) NK-92/5.28.z cells and haNK cells with trastuzumab were incubated with anti-NKG2A  
214 blocking antibody or control IgG for 60 min followed by co-culture with HT18584-HLA-E\**sp*G cells for 2  
215 hours, and specific cytotoxicity was measured using a Europium-based cytotoxicity assay. Representative  
216 data from three independent experiments done in triplicate are shown. Means  $\pm$  SD.

217

#### 218 SUPPLEMENTARY REFERENCES

- 219 1. Gong JH, Maki G, Klingemann HG. Characterization of a human cell line (NK-92) with  
220 phenotypical and functional characteristics of activated natural killer cells. *Leukemia*. 1994;8(4):652-8.
- 221 2. Schonfeld K, Sahm C, Zhang C, Naundorf S, Brendel C, Odendahl M, et al. Selective inhibition of  
222 tumor growth by clonal NK cells expressing an ErbB2/HER2-specific chimeric antigen receptor. *Molecular*  
223 *therapy : the journal of the American Society of Gene Therapy*. 2015;23(2):330-8.
- 224 3. Jochems C, Hodge JW, Fantini M, Fujii R, Morillon YM, 2nd, Greiner JW, et al. An NK cell line  
225 (haNK) expressing high levels of granzyme and engineered to express the high affinity CD16 allele.  
226 *Oncotarget*. 2016;7(52):86359-73.
- 227 4. Murad S, Michen S, Becker A, Fussel M, Schackert G, Tonn T, et al. NKG2C+ NK Cells for  
228 Immunotherapy of Glioblastoma Multiforme. *International journal of molecular sciences*. 2022;23(10).
- 229 5. Nowakowska P, Romanski A, Miller N, Odendahl M, Bonig H, Zhang C, et al. Clinical grade  
230 manufacturing of genetically modified, CAR-expressing NK-92 cells for the treatment of ErbB2-positive  
231 malignancies. *Cancer immunology, immunotherapy : CII*. 2018;67(1):25-38.
- 232 6. Sanjana NE, Shalem O, Zhang F. Improved vectors and genome-wide libraries for CRISPR  
233 screening. *Nature methods*. 2014;11(8):783-4.
- 234 7. Gudipati V, Rydzek J, Doel-Perez I, Goncalves VDR, Scharf L, Konigsberger S, et al. Inefficient CAR-  
235 proximal signaling blunts antigen sensitivity. *Nature immunology*. 2020;21(8):848-56.

236
