# Supplementary figures and images for: CAR-mediated targeting of NK cells overcomes tumor immune escape caused by ICAM-1 downregulation
Source: PubMed Central journal article supplement — J Immunother Cancer. 2024 Feb 27;12(2):e008155. doi: 10.1136/jitc-2023-008155 (PMC10900364; doi:10.1136/jitc-2023-008155), 2024-02-27

Fig. S1

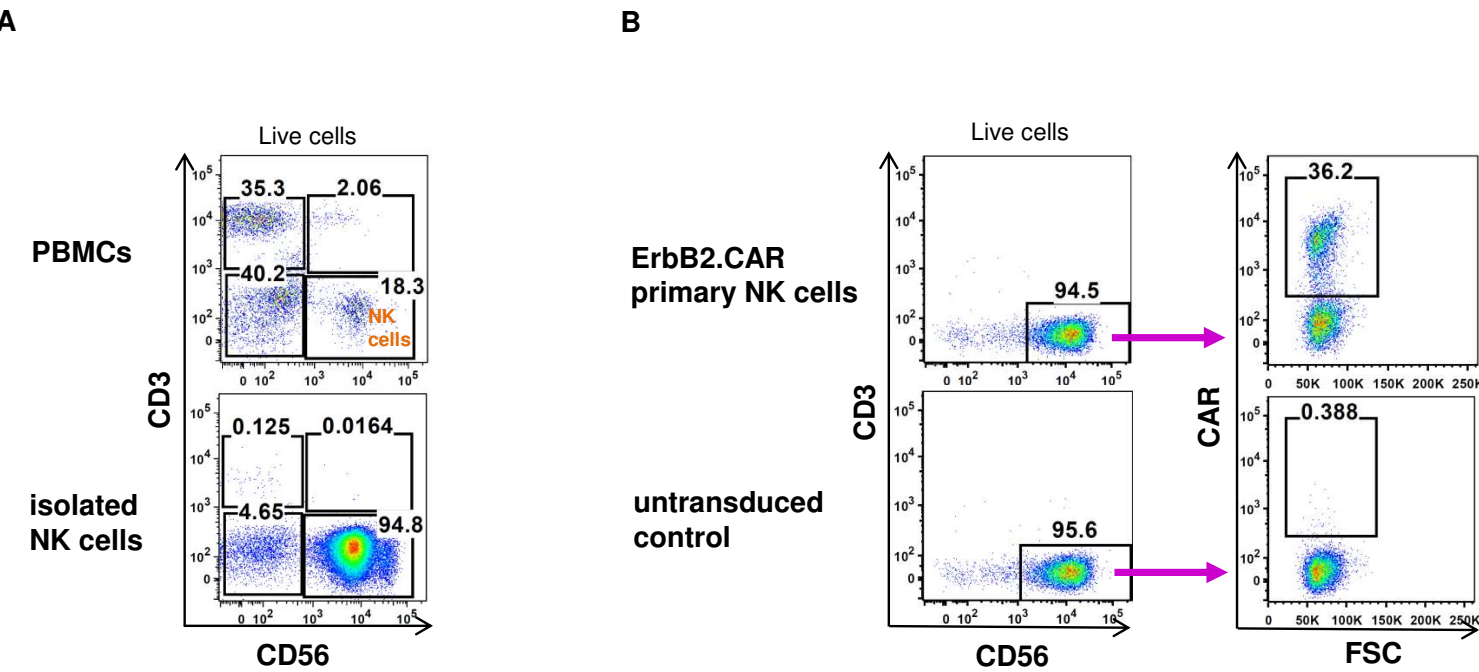

Supplement: jitc-2023-008155supp003.pdf [file jitc-2023-008155supp003.pdf]

Fig. S2

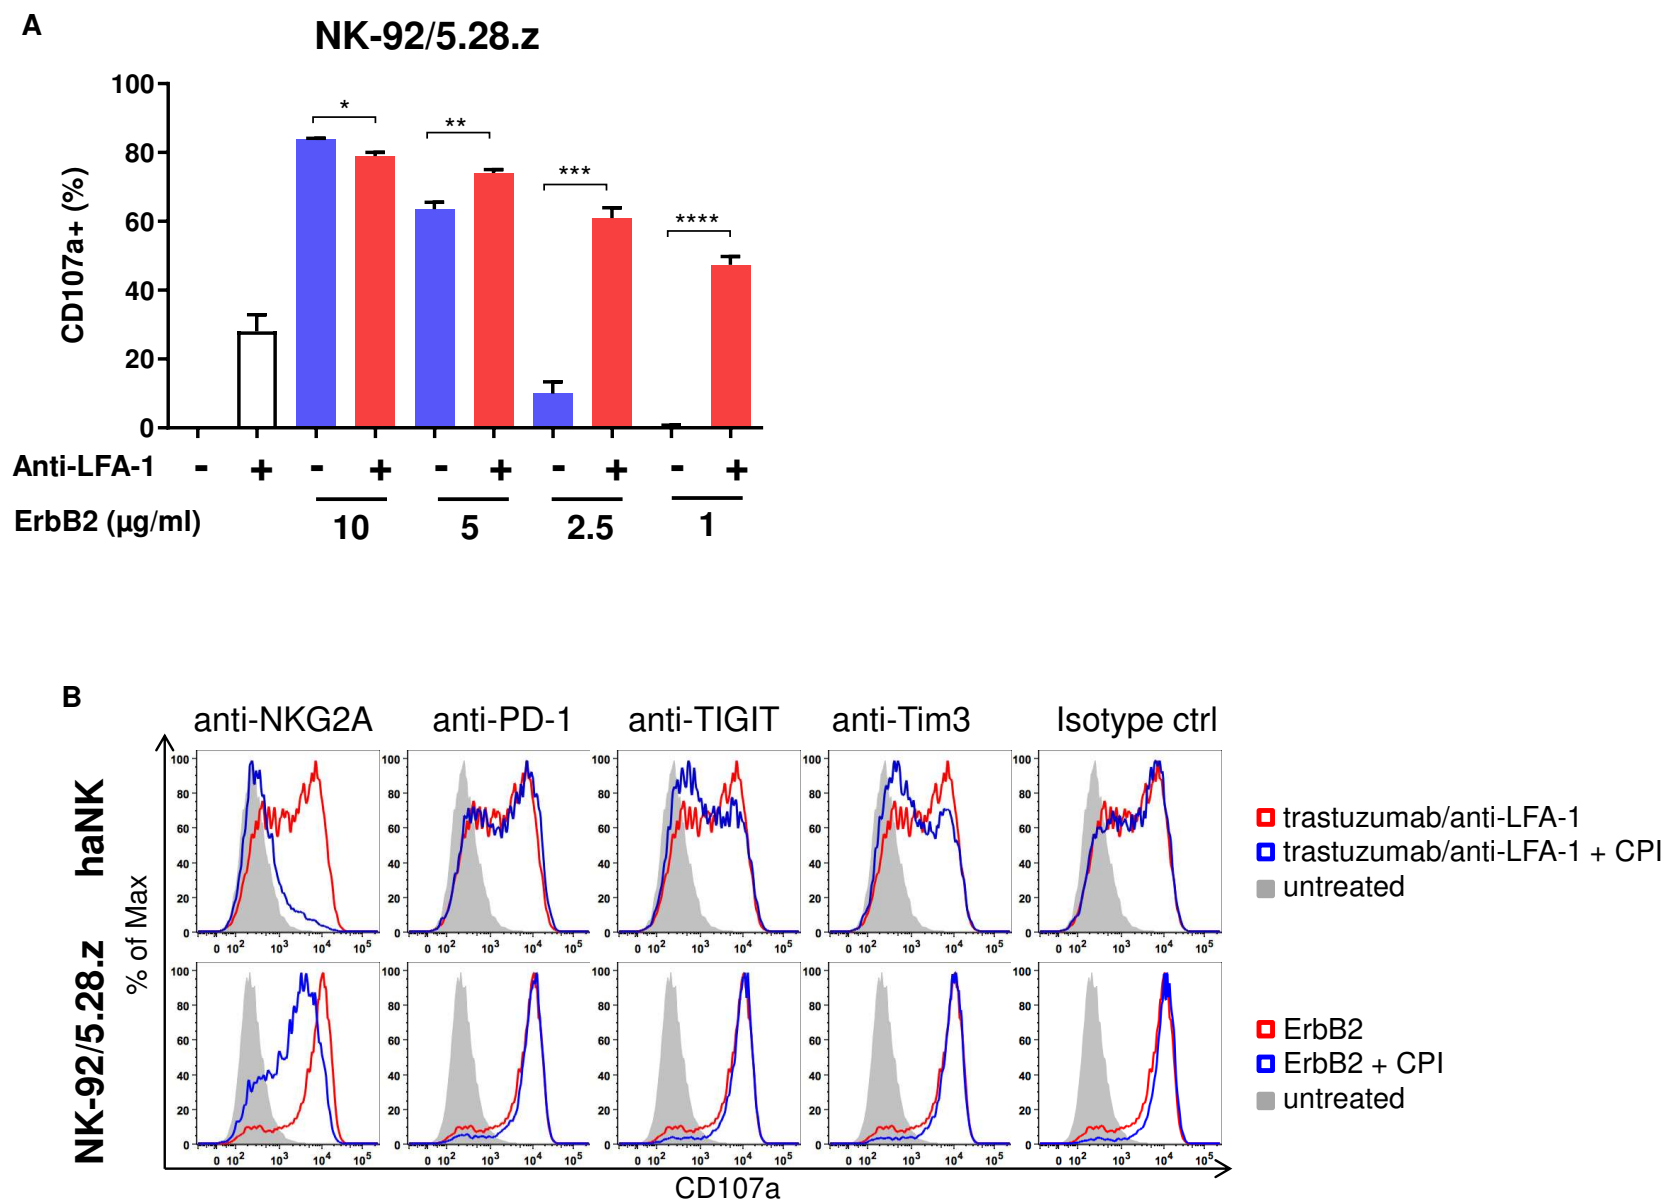

Supplement: jitc-2023-008155supp004.pdf [file jitc-2023-008155supp004.pdf]

Fig. S4

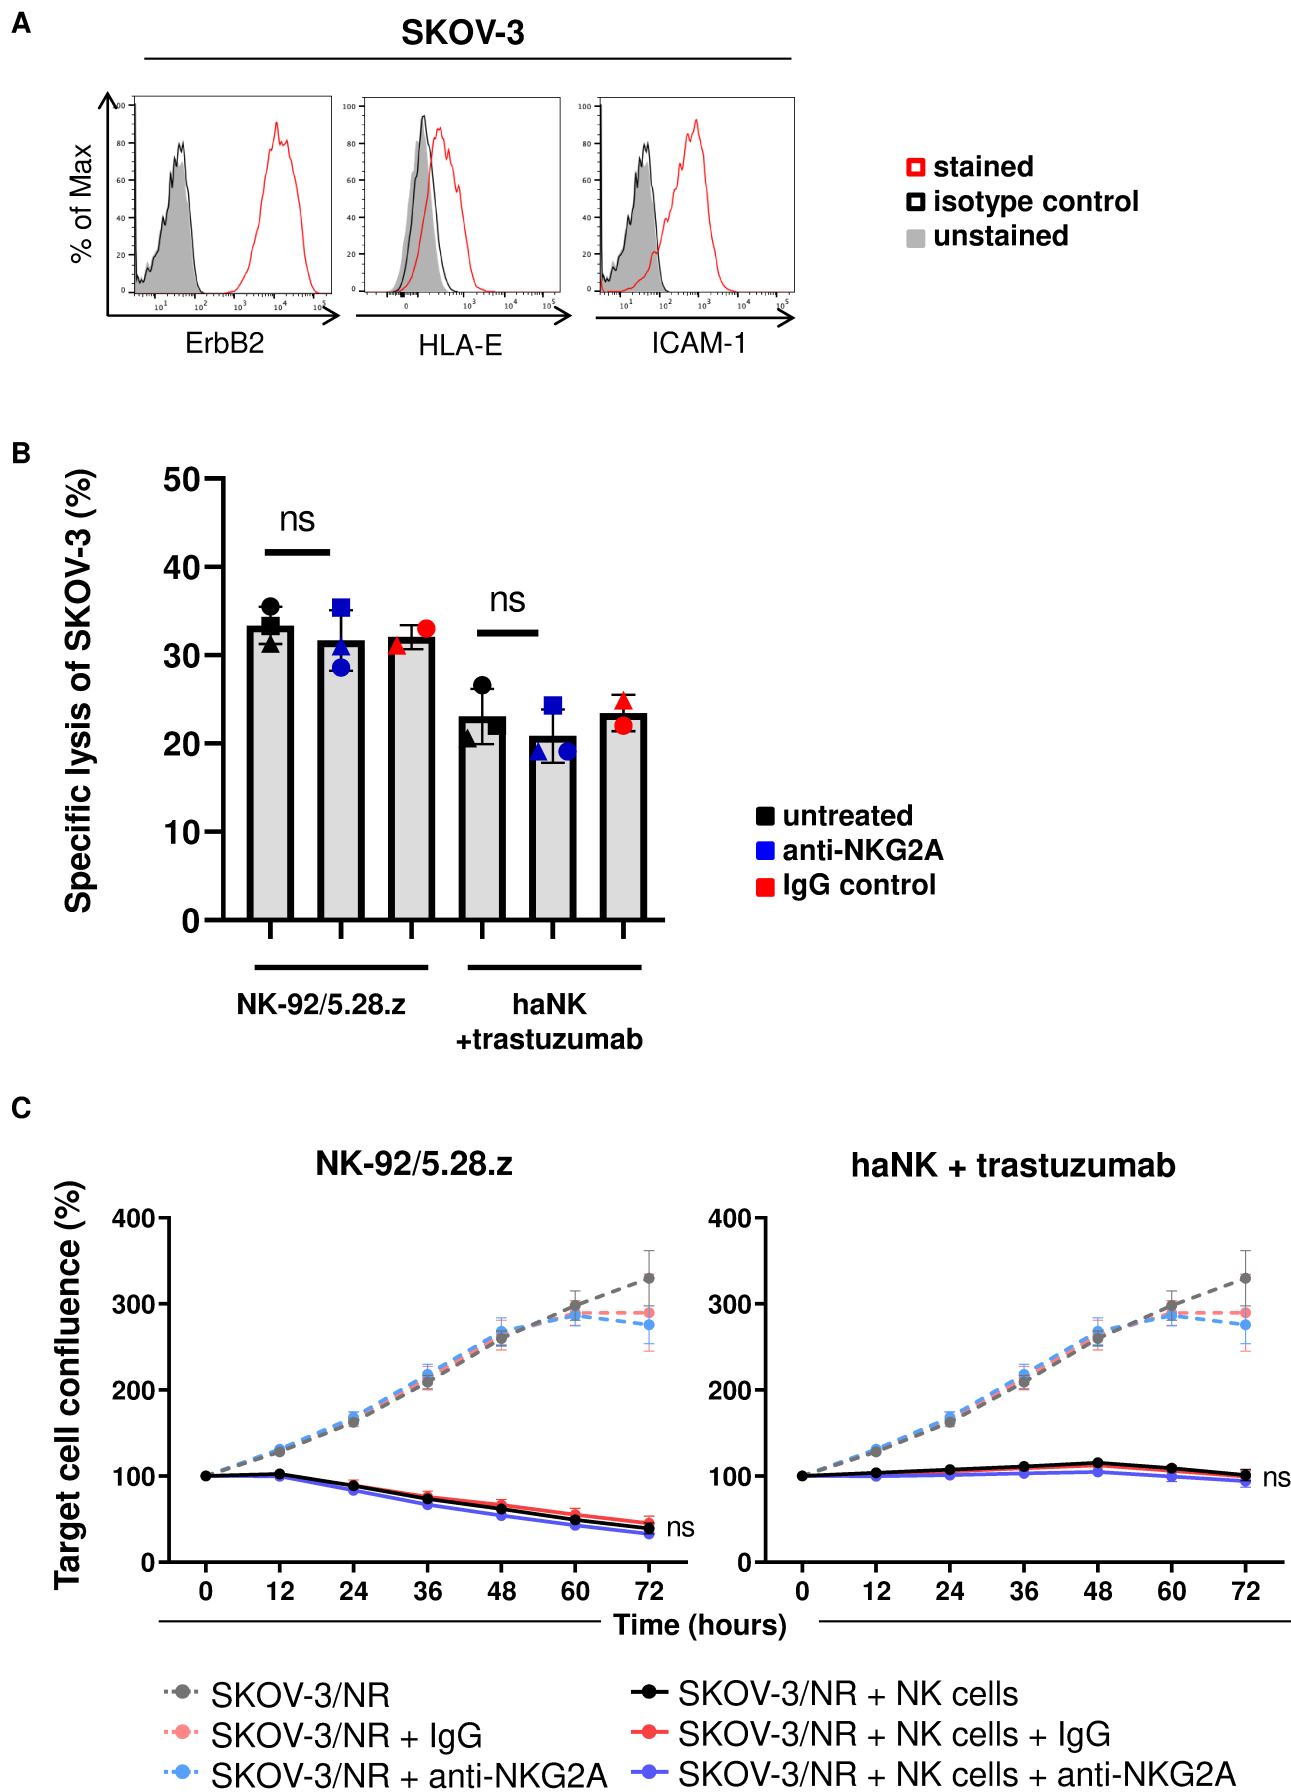

Supplement: jitc-2023-008155supp005.pdf [file jitc-2023-008155supp005.pdf]

Fig. S5

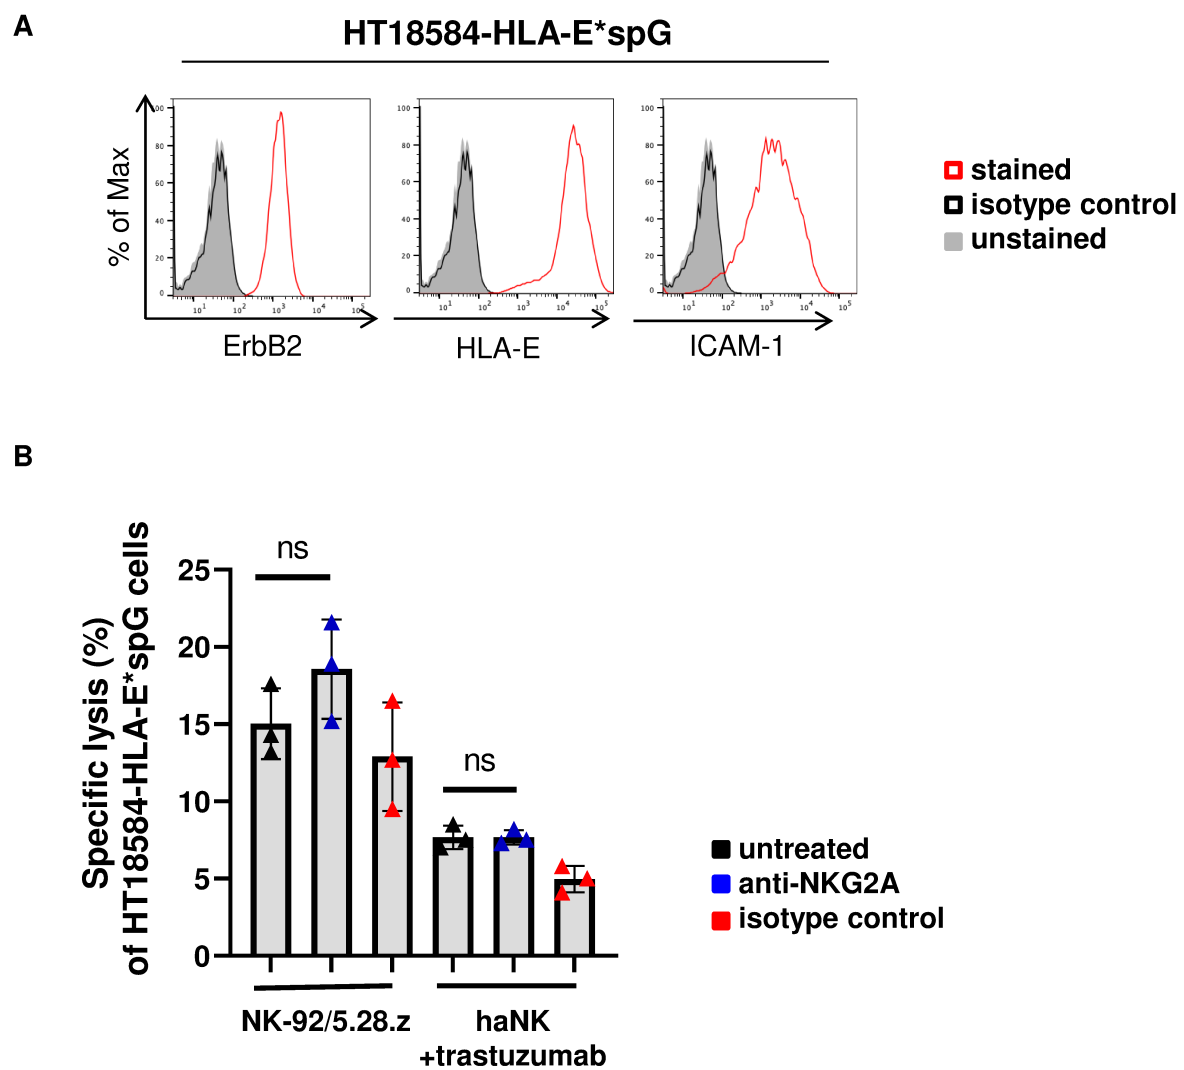

Supplement: jitc-2023-008155supp007.pdf [file jitc-2023-008155supp007.pdf]
